# Dissociable Brain Activation Responses to 5-Hz Electrical Pain Stimulation

## A High-field Functional Magnetic Resonance Imaging Study

Michael T. Alkire, M.D.,\* Nathan S. White, B.S.,† Raymond Hsieh, M.D.,‡ Richard J. Haier, Ph.D.§

**Background:** To elucidate neural correlates associated with processing of tonic aching pain, the authors used high-field (3-T) functional magnetic resonance imaging with a blocked parametric study design and characterized regional brain responses to electrical stimulation according to stimulus intensity–response functions.

**Methods:** Pain was induced in six male volunteers using a 5-Hz electrical stimulus applied to the right index finger. Scanning sequences involved different levels of stimulation corresponding to tingling sensation (P1), mild pain (P2), or high pain (P3). Common effects across subjects were sought using a conjunction analysis approach, as implemented in statistical parametric mapping (SPM-99).

**Results:** The contralateral posterior/mid insula and contralateral primary somatosensory cortex were most associated with encoding stimulus intensity because they showed a positive linear relation between blood oxygenation level–dependent signal responses and increasing stimulation intensity ( $P1 < P2 < P3$ ). The contralateral secondary somatosensory cortex demonstrated a response function most consistent with a role in pain intensity encoding because it had no significant response during the innocuous condition (P1) but proportionally increased activity with increasingly painful stimulus intensities ( $0 < P2 < P3$ ). Finally, a portion of the anterior cingulate cortex (area 24) and supplementary motor area 6 demonstrated a high pain-specific response (P3).

**Conclusions:** The use of response function modeling, conjunction analysis, and high-field imaging reveals dissociable regional responses to a tonic aching electrical pain. Most specifically, the primary somatosensory cortex and insula seem to encode stimulus intensity information, whereas the secondary somatosensory cortex encodes pain intensity information. The cingulate findings are consistent with its proposed role in processing affective–motivational aspects of pain.

FUNCTIONAL neuroimaging techniques, including positron emission tomography, functional magnetic resonance imaging (fMRI), and magnetoencephalography, have played an important role in elucidating how the human brain processes noxious sensory stimuli.<sup>1–6</sup> Early work using these techniques employed relatively straightforward study designs (*i.e.*, categorical designs) that made inferences on brain function by contrasting

state-related (pain *vs.* nonpain) brain activity. These studies, following the analysis approach of cognitive subtraction, have been successful in addressing the neuroanatomy of pain and have helped to develop the concept of the central pain matrix, a network of supraspinal structures involved in processing nociceptive information.<sup>4</sup> However, these studies offered little insight into how the observed changes in brain function relate to the different behavioral aspects of the pain experience, which is viewed as a complex amalgam of sensory–discriminative, affective–motivational, and cognitive–evaluative components.<sup>4</sup>

More recent neuroimaging studies using advanced study designs (*i.e.*, parametric and factorial designs) have started to probe the nature of the complex relations between brain function and the sensory, affective, and cognitive components of the pain experience.<sup>2,7–14</sup> As a recent example, Büchel *et al.*<sup>15</sup> (2002) used a parametric single-trial fMRI study design to investigate differential responses of the anterior cingulate cortex (ACC) to laser-induced pain. Büchel *et al.* characterized the responses of the ACC according to a set of stimulus intensity–response functions (SIRFs) as encoding (1) stimulus intensity, voxels identified where blood oxygen level–dependent (BOLD) signal changes increased linearly with a roughly linear increase in delivered stimulus intensity; (2) pain intensity, voxels identified where BOLD signal intensity was not significantly affected by subpainful stimulation intensities but proportionately increased with painful trials; or (3) stimulus perception, voxels identified where BOLD signals differentiated between the presence and absence of subjective stimulus awareness. Using this novel approach, Büchel *et al.* were able to attribute functional roles to different regions in the ACC with respect to different facets of pain processing. A more recent follow-up study by this group reported findings for the rest of the brain.<sup>16</sup> The newer work showed differential SIRFs related to functional changes of activity in the amygdala, prefrontal, insula, and somatosensory cortex.

Here, we implement analysis methods similar to those used by Büchel *et al.* to investigate stimulus intensity–response functions as they apply to regional activations evident throughout the brain in response to a tonic aching-type of pain. We chose to study specifically the neural correlates of a tonic aching-type of pain because anesthesiologists are often involved with treating such pain perioperatively, and electrical pain well approxi-

\* Assistant Professor in Residence, † Staff Research Associate, ‡ Resident, Department of Anesthesiology, § Professor in Residence, Department of Pediatrics.

Received from the Departments of Anesthesiology and Pediatrics, University of California, Irvine, Irvine, California. Submitted for publication June 9, 2003. Accepted for publication October 15, 2003. Support was provided solely from departmental sources. Presented in part at the Annual Meeting of the American Society of Anesthesiologists, Orlando, Florida, October 12–16, 2002.

Address reprint requests to Dr. Alkire: Department of Anesthesiology, University of California Irvine Medical Center, 101 City Dr. South, Building 53, Route 81-A, Orange, California 92868. Address electronic mail to: malkire@uci.edu. Individual article reprints may be purchased through the Journal Web site, www.anesthesiology.org.

mates the pain of tail clamp (*i.e.*, the stimulus used to determine minimum alveolar concentration values in animal models).<sup>17</sup> Taken together, this background suggests an experimental model of tonic aching electrical pain might have utility for future mechanistic work in humans regarding the effects of anesthesia on pain processing. A quantitative tonic aching pain experience is readily provided by the 5-Hz electrical stimulation delivered from a Neurometer (Neurotron, Incorporated, Baltimore, MD) current perception-testing device. The device can be used in a manual mode to deliver titrated pain stimuli in a manner useful for study in an fMRI experiment. Because we were interested in assessing brain responses associated with processing tonic pain, we specifically used a blocked experimental design, rather than an event-related design. Thus, we combine here a blocked parametric study design and modeling of SIRFs with high-field (3-T) fMRI of a tonic aching 5-Hz electrical stimulus.

## Materials and Methods

### Subjects

Six healthy right-handed male volunteers participated in this study. Subjects had a mean age of  $29.5 \pm 6$  yr (range, 24–41 yr). The study was approved by the University of California (Irvine, California) institutional review board, and all subjects gave written informed consent. Subjects were recruited from the local college campus and graduate schools and were compensated for their participation.

### Experimental Protocol: Electrical Stimulation and Pain Rating

For each subject, two gold cup stimulating electrodes were placed on the right index finger such that the delivered electrical stimulation crossed the distal interphalangeal joint. A conductive gel was used, and the electrodes were held in place with an adhesive strip. Stimulation was delivered using the Neurometer device, which gave a constant AC current (5-Hz sine wave) at predefined intensities. Additional cable wire length was added to the Neurometer cable so that the device could be located in the magnetic resonance imaging control room with the electrodes in place on the subject's finger during scanning.

Before scanning, each subject adjusted the stimulus intensity using the method of ascending limits to correspond with a subjective feeling of (1) tingling sensation, P1; (2) mild pain, P2; or (3) high pain, P3. Subjective ratings were performed using the 0–10 numeric pain distress scale. Subjects were told to adjust the intensity of the pain to provide an experience of 3 out of 10 for the mild-pain condition (P2) and 7 out of 10 for the high-pain condition (P3). Subjects adjusted the nonpain-

ful stimulus (*i.e.*, P1) to a point where a noticeable tingling sensation could be consistently felt over a 30-s time frame. The scale used identified 10 out of 10 as the worst pain imaginable and 0 out of 10 as a tingling sensation. All subjects qualitatively described the 5-Hz stimulation from the Neurometer as a deep aching-type of pain relative to the devices other stimulation settings of 250 and 2,000 Hz. The 250-Hz setting was commonly described as a sharp and poking pins-and-needles type of feeling, whereas the 2,000-Hz setting was described as a more tingling, vibrating, burning sensation.

### Imaging Protocol: Experimental Design and Image Acquisition

All subjects underwent eight imaging sequences without repositioning in the scanner (one structural scan followed by seven functional scanning sequences). Data were obtained on a Picker/Philips 3-T scanner (Philips Medical Systems, N.A., Bothell, WA). The structural scan was obtained using a high-resolution three-dimensional spoiled gradient recalled acquisition of steady state sequence (field of view = 240 mm;  $256 \times 256$  in-plane resolution; 2.5-mm axial slice thickness; repetition time = 50 ms; flip angle =  $50^\circ$ ). This scan was followed by a series of echo planar image acquisitions to obtain the magnetic field map.<sup>18</sup> The field map is used during post-processing of the raw data to correct for geometric and intensity distortions in echo planar image scans. Each subsequent functional scanning sequence then acquired 90 volumes (22 contiguous 5-mm-thick axial slices using a gradient echo planar imaging T2\*-sensitive sequence; repetition time = 3 s, echo time = 40 ms; flip angle =  $90^\circ$ ;  $128 \times 128$  in-plane resolution, field of view = 20 cm).

The first functional scanning sequence for each subject measured the BOLD response to tapping of the right index finger in four 30-s on–off blocks (tapping alternating with rest). This session served only to acclimate the subjects to the echo planar image scanning sequence. During pain imaging sessions, subjects remained motionless, with their eyes closed. Before the start of each pain imaging sequence, subjects verified that the electrical stimulus elicited the appropriate targeted pain level. The subjects were not specifically instructed to attend to the pain stimulation during the functional scanning. Six imaging sequences subsequently followed in the pseudorandom order of P3, P2, P1, P2, P3, and P1. Each sequence consisted of alternating 30-s epochs of rest (R, no stimulation) followed by a 30-s period of continuous 5-Hz electrical stimulation applied to the right index finger, for a total of five rest periods and four stimulation periods per run (stimulus onset asynchrony = 20 scans). The intersession period was kept consistent at 3 min across all subjects.

### Image Processing and Statistical Analysis

Image processing and statistical analyses were performed using SPM-99 (Wellcome Department of Imaging Neuroscience, London, United Kingdom).<sup>19</sup> For all subjects, all image volumes were realigned to the first volume of the subject's first imaging sequence, spatially normalized to a standard echo planar image template (*i.e.*, Montreal Neurologic Institute) based on the atlas of Talairach and Tournoux,<sup>20</sup> and were spatially and temporally smoothed with an 8-mm and a 4-s isotropic Gaussian filter, respectively. Because high-field fMRI often induces geometric distortions of the BOLD signal in the temporal lobe and orbital frontal regions (susceptibility artifacts), we only considered brain regions superior to the anterior commissure in the current study (specifically, all axial slices above  $z = -4$  mm with respect to standard Montreal Neurologic Institute stereotactic space). The first three image volumes of each session were removed to allow for T1 magnetic saturation effects.

The model regressors (explanatory variables) used to estimate the effects of interest consisted of boxcar stimulus functions (representing the alternate stimulus and rest epochs) convolved with a canonical hemodynamic response function. Specific effects of interest were sought using appropriate linear contrasts of the parameter estimates (regression coefficients of the explanatory variables) and comparing these estimates with the residual error variance of the images. Statistical inferences were made according to Gaussian random field theory.<sup>19</sup> Data were analyzed using conjunction analyses within a fixed-effects model to make inferences about the entire group of subjects.<sup>21</sup> Given the relatively small sample size, the conjunction analysis approach helps to localize and identify regional effects that would likely generalize to a larger sample. In essence, this analysis approach does not seek to reject a single null hypothesis that there is no overall (mean) effect across subjects due to the applied electrical stimulation; rather, it seeks to jointly reject multiple null hypotheses that there are no effects in each subject individually. All the above procedures were performed within the context of the general linear model as implemented in SPM-99.

### Stimulus Intensity-Response Functions

To make inferences regarding the functional role played by different brain regions in processing the applied electrical stimuli, a set of *a priori* SIRFs were constructed that closely mirrored those developed by Büchel *et al.*<sup>15</sup> These SIRFs modeled the predicted BOLD responses of brain regions responsible for encoding (1) stimulus intensity, voxels identified where BOLD signal changes increased linearly with a roughly linear increase in delivered stimulus intensity; (2) pain intensity, voxels identified where BOLD signal intensity was not significantly affected by the subpainful stimulation intensity

but proportionately increased with the increasing pain of the painful sequences; or (3) high pain-specific responses, voxels identified where a significant BOLD signal increase was observed only during the high-pain condition. Stimulus intensity encoding regions were identified by constructing a contrast whose amplitude was linearly modulated over all the stimulus conditions (P1-P3). Pain intensity-encoding regions were identified using a contrast whose amplitude proportionally increased over the pain conditions (P2, P3) and modeled no contribution coming from the innocuous condition (P1). To ensure that the brain regions identified using this contrast were specific only to the painful conditions, an explicit mask ( $P < 0.05$ , uncorrected) was used to broadly exclude regions that showed activation during the innocuous trials. High pain-specific encoding regions were identified using a contrast modeling significant differences between the high and mild conditions ( $P3 > P2$ ). An explicit mask ( $P < 0.001$ , uncorrected) was also used, which specifically excluded those regions showing any significant effect to linearly increasing stimulus intensity. For all examinations, a significance threshold of  $P < 0.05$ , corrected, was used, except in the case of the high pain-specific encoding SIRF, where we accepted a  $P$  value of 0.001, uncorrected, as significant because of the strong *a priori* expectation that the ACC should be identified with this analysis. Büchel *et al.*<sup>15,16</sup> used an identical *a priori* threshold in their recent reports.

## Results

### Behavioral Data

The relation between subjective pain rating and stimulus intensity was approximately linear for each subject and across the group of subjects, as shown in figure 1. On average, a tingling sensation rating was associated with a mean ( $\pm$  SD) stimulus intensity of  $55 \pm 26$  mA. The mild- and high-pain ratings were associated with mean stimulus intensities of  $103 \pm 60$  and  $153 \pm 97$  mA, respectively. The data are shown plotted across the six subjects after normalizing for baseline differences in current intensity thresholds. An overall analysis of variance revealed a significant effect difference across the three levels of normalized stimulus intensity ( $P < 0.001$ ), with all pairwise comparisons showing significant differences, after Bonferroni correction for multiple comparisons ( $P < 0.001$  for all).

### fMRI Data

All trials from each subject were modeled as separate regressors (columns) in the design matrix. The SIRF was modeled using the magnitude of the responses (*i.e.*, parameter estimates) plotted against condition type (rating). The conjunction of appropriate linear contrasts

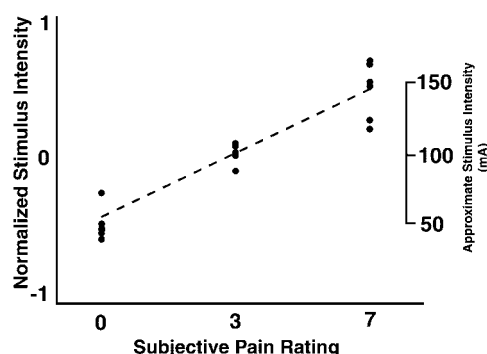

**Fig. 1.** Relation between subjective pain rating (*x-axis*) and normalized stimulus intensity (*y-axis*). The subjective pain ratings of 0, 3, and 7 correspond to trial types P1, P2, and P3, respectively. For each subject, the stimulus intensity for each trial type was normalized with respect to the overall grand mean (mean over all trials). The ordinate value for any particular dot indicates the amount of deviation from this mean. The inserted *y-axis* on the right is representative of the average stimulus intensity (in milliamperes) across all six subjects. The mean stimulus intensities across all six subjects were 54.8, 103, and 153.5 for trial types P1, P2, and P3, respectively. The dotted line represents the linear regression over all subjects.

allowed us to identify common brain regions (across all subjects) that fit any particular SIRF. The modeled SIRFs are shown in figure 2.

#### *Areas Showing a Stimulus Intensity-related SIRF*

Only three brain regions were found with this analysis, as detailed in table 1 and shown in figure 3A. These regions included the contralateral posterior insular cortex, the contralateral secondary somatosensory cortex (SII), and the contralateral primary somatosensory cortex (SI). Noticeably absent from this result are numerous other brain regions, such as the thalamus and the ACC, which have often been associated with central pain processing in multiple previous brain imaging studies.

#### *Areas Showing a Pain Intensity-related SIRF*

As shown in figure 3B, the only region that followed this pain intensity SIRF was the contralateral SII cortex. This was the same region of the SII cortex that was previously identified using the stimulus intensity-related SIRF. Whereas this SII region was identified with both SIRFs, close inspection of the BOLD response within this area reveals that its activity fits the SIRF modeling pain

**Table 1.** Stimulus-evoked Brain Activations

| Response Category           | Brain Region | MNI Coordinates (x, y, z), mm | Z Score |
|-----------------------------|--------------|-------------------------------|---------|
| Stimulus intensity encoding | PI           | -40, -20, 12                  | > 8.0*  |
|                             | SII          | -52, -22, 18                  | 5.67*   |
|                             | SI           | -44, -34, 62                  | 5.10*   |
| Pain intensity encoding     | SII          | -54, -22, 20                  | 5.83*   |
| High-pain encoding          | pACC         | 2, 12, 32                     | 3.89†   |
|                             | SMA          | 4, 10, 68                     | 3.52†   |

\*  $P \leq 0.05$ , corrected. †  $P \leq 0.001$ , uncorrected.

MNI = Montreal Neurological Institute; pACC = posterior anterior cingulate cortex, Brodmann area 24; PI = posterior insula; SI = primary somatosensory cortex; SII = secondary somatosensory cortex; SMA = supplementary motor area, Brodmann area 6.

intensity better than the SIRF modeling stimulus intensity because there was no significant BOLD response during the innocuous condition (P1). Again, noticeably absent from this result are any other brain regions often associated with central processing of pain.

#### *Areas Showing High Pain Intensity-related SIRF*

This SIRF shows those brain regions that were activated when the applied stimulus became particularly painful, excluding those regions that increased their activity in response to increasing stimulus intensity. Two regions were found with this analysis, including the anterior portion of the midcingulate cortex and supplementary motor association cortex, as shown in figure 3C and as detailed in table 1. Figure 4 also shows a magnified view of the response in the anterior midcingulate cortex superimposed on the Talairach atlas for better visualization of its anatomic location. The response approaches the posterior edge of the perigenual ACC.

## Discussion

The neural correlates of a tonic aching pain, induced with a 5-Hz electrical stimulus, were investigated in humans using high-field (3-T) fMRI. Data were analyzed using SIRFs designed to identify brain regions encoding (1) stimulus intensity information, (2) pain intensity information, and (3) intense pain responses. The results provide strong confirmatory evidence that brain regions neighboring the parietal operculum (*i.e.*, posterior insula

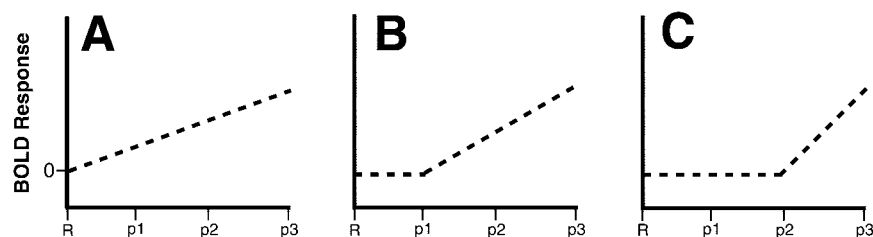

**Fig. 2.** The stimulus intensity-response functions (SIRFs). The SIRF shown in A represents a proportional increase in blood oxygenation level-dependent response with respect to stimulus intensity. Brain regions with this type of response are thought to encode stimulus intensity. The SIRF shown in B does not show a response to P1 (*i.e.*, does not differentiate between rest [R] and P1), but shows a proportional increase over the painful trials (P2, P3). Brain regions with this type of response are thought to encode pain intensity. The SIRF shown in C is a step function that does not differentiate between R, P1, and P2, but shows blood oxygenation level-dependent (BOLD) response only to P3. This SIRF models brain regions that respond only to high pain (high-pain-specific responses).

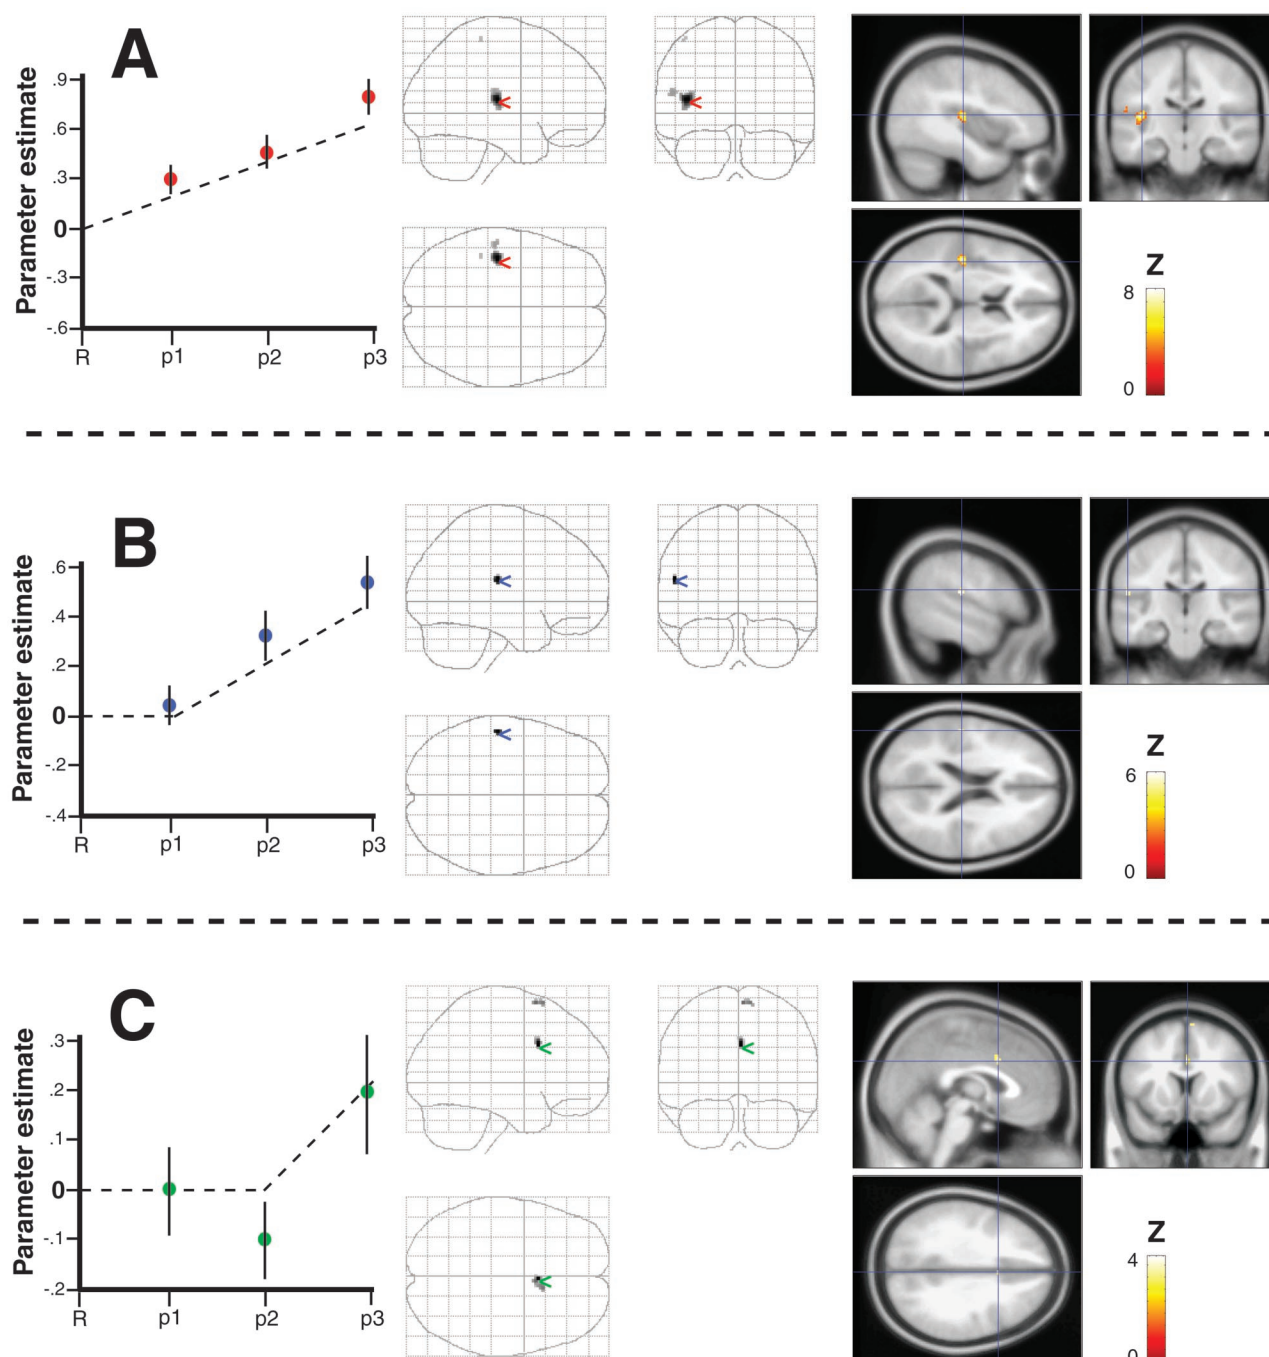

**Fig. 3.** Statistical parametric mapping results of the modeled stimulus intensity–response functions. The stimulus intensity–response functions (as per fig. 1) are shown in the *first column*, with the *dotted line* representing the modeled response and the *closed circles* representing the measured blood oxygenation level–dependent signal changes (mean  $\pm$  SEM) for the identified clusters (highlighted with the < symbol). The regional responses are color coded such that *red* = stimulus intensity–related responses (contrast  $-1, 0, 1$ ); *blue* = pain intensity–related responses (contrast  $0, 0.5, 1$ ; masked with  $1, 0, 0$ ); and *green* = high pain–specific responses (contrast  $0, -1, 1$ ; masked with  $-1, 0, 1$ ). The *second column* shows the glass brain statistical parametric mapping maximum intensity projection results for the modeled stimulus intensity–response functions (regional cluster coordinates are listed in table 1). Results in the *first and second rows* are displayed at  $P < 0.05$ , corrected for multiple comparisons. The results in the *third row* are displayed at  $P < 0.001$ , uncorrected. The *third column* shows the regional results displayed on sections of the representative structural magnetic resonance image that was used for normalization. P1 = tingling sensation; P2 = mild pain; P3 = high pain; R = rest.

and SII) as well as SI are important components of the central pain system that are intimately involved with processing the sensory–discriminative aspects of a tonic aching pain. Activity changes within the posterior insula

and SI were found to fit the SIRM modeling stimulus intensity encoding. These regions showed a roughly linear increase in BOLD signal that paralleled the roughly linear increase in the delivered stimulus intensity. In



matosensory cortices were found to respond whatever the attentional context and might, therefore, subserve the sensory-discriminative dimension of pain (intensity coding).” Coghill *et al.*<sup>7</sup> found in a positron emission tomography study that numerous brain areas, including the insula and SII regions, bilaterally increased activation over a range of stimulation intensities with increasing pain intensity. These previous findings are not inconsistent with our current results because the regions identified here also increased activity over the range of stimulation intensities presented. However, in contrast to these previous studies, our findings can be further segregated because of the increased spatial resolution provided by the high-field magnet and our use of response function modeling. To illustrate further, Timmermann *et al.*,<sup>6</sup> using magnetoencephalography, demonstrated that both SI and SII activation correlated with stimulation intensity, but the two areas differed in their dependence on stimulation parameters. SI activity resembled an exponential function that matched subjects’ subjective pain ratings, whereas SII activity showed an S-shaped function with a sharp increase in amplitude only at higher pain intensity stimulations. The patterns of magnetoencephalographic activity found by Timmermann *et al.* and the anatomic locations of their findings are remarkably consistent with the current fMRI results, where both SI and SII were identified with the stimulus intensity-response function, but only the SII activation was found to be best modeled by the more specific pain intensity-encoding SIRF. This suggests neurons in SII may have little or no baseline firing rate related to stimulation intensity, but they are capable of rapidly modulating their firing rates upward as stimulation intensity reaches and surpasses subjective levels of pain. The findings from Bornhovd *et al.*<sup>16</sup> also document similar differences between the response patterns seen in SI and the anterior insula, as compared with those found for SII and the posterior insula. Taken together with our current findings, these imaging and neuropathologic findings help to firmly establish that the insular cortex, SII, and to some extent SI all play a fundamental role in stimulus intensity encoding across a broad range of stimulus intensities, ranging from innocuous to clearly painful stimulation, and thus are likely to be “necessary” components required for the sensory-discriminative processing of aching/throbbing pain.

#### *Findings Related to the Affect-motivation Aspects of Pain*

Numerous studies link functional activity of the ACC to pain processing. The ACC is hypothesized to represent a brain region involved with encoding the affective component of pain.<sup>8,9,13,15,39–41</sup> The high pain-specific response found in this study was located in the pACC (fig. 4), in good agreement with recent studies investigating both single-unit activity recorded within this region and

fMRI responses seen at 1.5 T.<sup>13,40,42</sup> Kwan *et al.*<sup>13</sup> conducted a detailed study of the regional activations seen with pain processing in the anterior cingulate and surrounding medial wall areas. They pooled their individual fMRI activations across subjects to create activation maps that best approximated those regions of the ACC associated with the processing of the different pain stimuli studied. Their heat pain-related finding was localized primarily to a small region of the pACC, and our current pACC finding is localized precisely within the borders of their pooled activation map. Our data, based on the statistical conjunction of multisubject activations, show that both procedural methodologies converged toward a remarkably similar endpoint.

In contrast with the findings of Büchel *et al.*<sup>15</sup> (2002), on which our stimulus intensity-response function modeling methodology is based, we did not find any stimulus intensity- or pain intensity-related responses localized to the ACC region. There are numerous differences in methodology between our study and the study of Büchel *et al.* that might explain our failure to find stimulus- and intensity-related effects in the ACC. In addition, these differences in study design apply to the particular findings of Bornhovd *et al.*<sup>16</sup> (2002) as well. We used an electrical stimulus, which may activate more than a single type of pain fiber; they used a laser stimulus, which is likely to be much more specific for only C-fiber activation. We used a boxcar design, with no cognitive expectations placed on the subjects; they used an event-related design that also included rating the stimulus intensity within each trial. Their design emphasized the processing of and the short-term memory components of a very brief pain experience. Our design emphasized what happens in the brain when someone experiences a tonic aching-type of pain. Furthermore, part of the purpose of this work was to identify what brain regions are commonly activated by the stimulus used across the group of subjects studied. We found a statistically reliable convergence of regional effects at high field (3 T), with a sample size of only six subjects, whereas they had nine subjects studied at 1.5 T. Certainly, a larger sample size in this study may have worked to identify other areas of interest, but at the same time, it may have made identification of commonality across the group more difficult. Regardless, given the substantial differences between studies, it would be unwarranted to interpret our lack of finding stimulus or pain intensity-related findings specific to the ACC as a result that is contradictory to the findings of Büchel *et al.* Other work exists that is consistent with our current findings. Peyron *et al.*<sup>12</sup> noted in their intensity and attentional study of pain that “anterior cingulate activity was not found to pertain to the intensity coding network but rather to the attentional neural activity triggered by pain.” Furthermore, the Berthier neuropathology data on asymbolia of pain did not reveal any sign of damage to the ACC.<sup>38</sup> Taken

together, these data seem more supportive for a role of the pACC in the sensory-integrative aspect of pain processing, rather than suggesting that the pACC plays a primary role in stimulus or pain intensity-related processing. However, we did not study the effects of increasing pain intensity responses past those causing pain rating of 7 out of 10. This leaves open the possibility that when the ACC comes online (*i.e.*, the pain experience is intense enough), the ACC then regulates its activity upward with further increasing pain intensity.

### Conclusion

Here, we used high-field (3-T) fMRI in volunteers to identify brain regions involved in processing pain as induced by 5-Hz electrical stimulation. Conjunction analyses, coupled with stimulus intensity-response function modeling, revealed the insula, SI, and SII are primary sites involved with encoding the sensory-discriminative aspects of a tonic aching/throbbing pain, and the pACC and supplementary motor association cortex sites are involved with encoding the affective-motivational aspects of a tonic aching/throbbing pain.

The authors thank the staff of the Center for Functional Onco-Imaging at the University of California, Irvine, California, for functional imaging data.

### References

- Chen AC: Human brain measures of clinical pain: A review: II. Tomographic imaging. *Pain* 1993; 54:133-44
- Derbyshire SW, Jones AK, Gyulai F, Clark S, Townsend D, Firestone LL: Pain processing during three levels of noxious stimulation produces differential patterns of central activity. *Pain* 1997; 73:431-45
- Davis KD, Kwan CL, Crawley AP, Mikulis DJ: Event-related fMRI of pain: Entering a new era in imaging pain. *Neuroreport* 1998; 9:3019-23
- Ingvar M: Pain and functional imaging. *Philos Trans R Soc Lond B Biol Sci* 1999; 354:1347-58
- Chen AC: New perspectives in EEG/MEG brain mapping and PET/fMRI neuroimaging of human pain. *Int J Psychophysiol* 2001; 42:147-59
- Timmermann L, Ploner M, Haucke K, Schmitz F, Baltissen R, Schnitzler A: Differential coding of pain intensity in the human primary and secondary somatosensory cortex. *J Neurophysiol* 2001; 86:1499-503
- Coghil RC, Sang CN, Maisog JM, Iadarola MJ: Pain intensity processing within the human brain: A bilateral, distributed mechanism. *J Neurophysiol* 1999; 82:1934-43
- Craig AD, Reiman EM, Evans A, Bushnell MC: Functional imaging of an illusion of pain. *Nature* 1996; 384:258-60
- Rainville P, Duncan GH, Price DD, Carrier B, Bushnell MC: Pain affect encoded in human anterior cingulate but not somatosensory cortex. *Science* 1997; 277:968-71
- Davis KD, Lozano AM, Tasker RR, Dostrovsky JO: Brain targets for pain control. *Stereotact Funct Neurosurg* 1998; 71:173-9
- Bushnell MC, Duncan GH, Hofbauer RK, Ha B, Chen JI, Carrier B: Pain perception: Is there a role for primary somatosensory cortex? *Proc Natl Acad Sci U S A* 1999; 96:7705-9
- Peyron R, Garcia-Larrea L, Gregoire MC, Costes N, Convers P, Lavenne F, Mauguier F, Michel D, Laurent B: Haemodynamic brain responses to acute pain in humans: Sensory and attentional networks. *Brain* 1999; 122(pt 9):1765-80
- Kwan CL, Crawley AP, Mikulis DJ, Davis KD: An fMRI study of the anterior cingulate cortex and surrounding medial wall activations evoked by noxious cutaneous heat and cold stimuli. *Pain* 2000; 85:359-74
- Davis KD, Pope GE, Crawley AP, Mikulis DJ: Neural correlates of prickle sensation: A percept-related fMRI study. *Nat Neurosci* 2002; 5:1121-2
- Büchel C, Bornhovd K, Quante M, Glauche V, Bromm B, Weiller C: Dissociable neural responses related to pain intensity, stimulus intensity, and stimulus awareness within the anterior cingulate cortex: A parametric single-trial laser functional magnetic resonance imaging study. *J Neurosci* 2002; 22:970-6
- Bornhovd K, Quante M, Glauche V, Bromm B, Weiller C, Büchel C: Painful stimuli evoke different stimulus-response functions in amygdala, prefrontal, insula and somatosensory cortex: A single-trial fMRI study. *Brain* 2002; 125:1326-36
- Laster MJ, Liu J, Eger EI II, Taheri S: Electrical stimulation as a substitute for the tail clamp in the determination of minimum alveolar concentration. *Anesth Analg* 1993; 76:1310-2
- Reber PJ, Wong EC, Buxton RB, Frank LR: Correction of off resonance-related distortion in echo-planar imaging using EPI-based field maps. *Magn Reson Med* 1998; 39:328-30
- Friston KJ, Holmes AP, Worsley KJ, Poline JB, Frith CD, Frackowiak RSJ: Statistical parametric maps in functional imaging: A general linear approach. *Hum Brain Mapp* 1995; 2:189-210
- Talairach J, Tournoux P: Co-planar stereotaxic atlas of the human brain. New York, Thieme, 1988
- Friston KJ, Holmes AP, Price CJ, Büchel C, Worsley KJ: Multisubject fMRI studies and conjunction analyses. *Neuroimage* 1999; 10:385-96
- Berthier ML, Starkstein SE: Transient partial amnesia. *J Neuropsychiatry Clin Neurosci* 1990; 2:465-6
- Liu S, Kopacz DJ, Carpenter RL: Quantitative assessment of differential sensory nerve block after lidocaine spinal anesthesia. *ANESTHESIOLOGY* 1995; 82:60-3
- Liu SS, Gerancher JC, Bainton BG, Kopacz DJ, Carpenter RL: The effects of electrical stimulation at different frequencies on perception and pain in human volunteers: Epidural versus intravenous administration of fentanyl. *Anesth Analg* 1996; 82:98-102
- Kiso T, Nagakura Y, Toya T, Matsumoto N, Tamura S, Ito H, Okada M, Yamaguchi T: Neurometer measurement of current stimulus threshold in rats. *J Pharmacol Exp Ther* 2001; 297:352-6
- Inui K, Tran TD, Qiu Y, Wang X, Hoshiyama M, Kakigi R: Pain-related magnetic fields evoked by intra-epidermal electrical stimulation in humans. *Clin Neurophysiol* 2002; 113:298-304
- Van Hees J, Gybels J: C nociceptor activity in human nerve during painful and non painful skin stimulation. *J Neurol Neurosurg Psychiatry* 1981; 44:600-7
- Davis KD, Wood ML, Crawley AP, Mikulis DJ: fMRI of human somatosensory and cingulate cortex during painful electrical nerve stimulation. *Neuroreport* 1995; 7:321-5
- Treede RD, Kenshalo DR, Gracely RH, Jones AK: The cortical representation of pain. *Pain* 1999; 79:105-11
- Treede RD, Apkarian AV, Bromm B, Greenspan JD, Lenz FA: Cortical representation of pain: Functional characterization of nociceptive areas near the lateral sulcus. *Pain* 2000; 87:113-9
- Greenspan JD, Winfield JA: Reversible pain and tactile deficits associated with a cerebral tumor compressing the posterior insula and parietal operculum. *Pain* 1992; 50:29-39
- Greenspan JD, Lee RR, Lenz FA: Pain sensitivity alterations as a function of lesion location in the parasympathetic cortex. *Pain* 1999; 81:273-82
- Burton H, Jones EG: The posterior thalamic region and its cortical projection in New World and Old World monkeys. *J Comp Neurol* 1976; 168:301-49
- Friedman DP, Murray EA: Thalamic connectivity of the second somatosensory area and neighboring somatosensory fields of the lateral sulcus of the macaque. *J Comp Neurol* 1986; 252:348-73
- Gabriel M: Discriminative avoidance learning: A model system, *Neurobiology of Cingulate Cortex and Limbic Thalamus: A Comprehensive Treatise*. Edited by Vogt BA, Gabriel M. Boston, Birkhäuser, 1993, pp 478-523
- Schilder P, Stengel E: Schmerzasympolie. *J Neurol Psychiatry* 1928; 113:143-8
- Geschwind N: Disconnection syndromes in animals and man: II. *Brain* 1965; 88:585-644
- Berthier M, Starkstein S, Leiguarda R: Asymbolia for pain: A sensory-limbic disconnection syndrome. *Ann Neurol* 1988; 24:41-9
- Derbyshire SW, Vogt BA, Jones AK: Pain and Stroop interference tasks activate separate processing modules in anterior cingulate cortex. *Exp Brain Res* 1998; 118:52-60
- Hutchison WD, Davis KD, Lozano AM, Tasker RR, Dostrovsky JO: Pain-related neurons in the human cingulate cortex. *Nat Neurosci* 1999; 2:403-5
- Rios M, Treede R, Lee J, Lenz FA: Direct Evidence of nociceptive input to human anterior cingulate gyrus and parasympathetic cortex. *Curr Rev Pain* 1999; 3:256-64
- Davis KD, Taylor SJ, Crawley AP, Wood ML, Mikulis DJ: Functional MRI of pain- and attention-related activations in the human cingulate cortex. *J Neurophysiol* 1997; 77:3370-80
